# Supplementary material
Source: Royal Society of Chemistry journal article supplement (doi:10.1039/d6eb00013d)
Supplement: d6eb00013d1.pdf [file d6eb00013d1.pdf]

## Supporting Information

### Dry-Milled Microstructure-Controlled Sulfide Electrolytes Enabling Superionic Transport and High-Capacity All-Solid-State Batteries

Ziyu Lu<sup>a, b</sup>, Siwu Li<sup>a</sup>, Lin Li<sup>b</sup>, Ziling Jiang<sup>b</sup>, Long Chen<sup>c, \*</sup>, Miao Deng<sup>b</sup>, Chen Liu<sup>d</sup>, Chuang Yu<sup>a, b, d, \*</sup>

<sup>a</sup> School of Information Mechanics and Sensing Engineering, Xidian University, Xi'an, Shaanxi 710126, P. R. China

<sup>b</sup> School of Chemistry and Chemical Engineering, Huazhong University of Science and Technology, Wuhan 430074, P. R. China

<sup>c</sup> Key Laboratory for Ultrafine Materials of Ministry of Education, School of Chemical Engineering, East China University of Science and Technology, 130 Meilong Road, Shanghai, 200237 China

<sup>d</sup> School of Electrical and Electronic Engineering, Huazhong University of Science and Technology, Wuhan, 430074, P. R. China

\* E-mail: [cyu\\_msubmit@163.com](mailto:cyu_msubmit@163.com)(Chuang Yu), [longchen@ecust.edu.cn](mailto:longchen@ecust.edu.cn) (Long Chen)

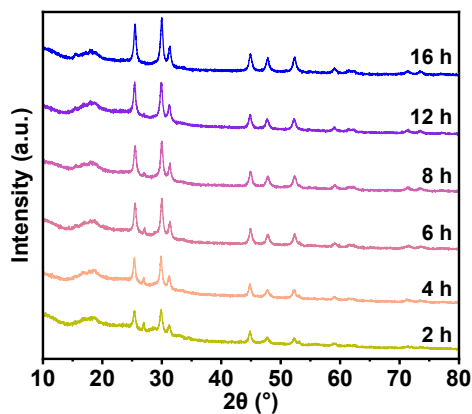

**Fig. S1.** XRD patterns of LPSCB electrolyte at different ball-milling times.

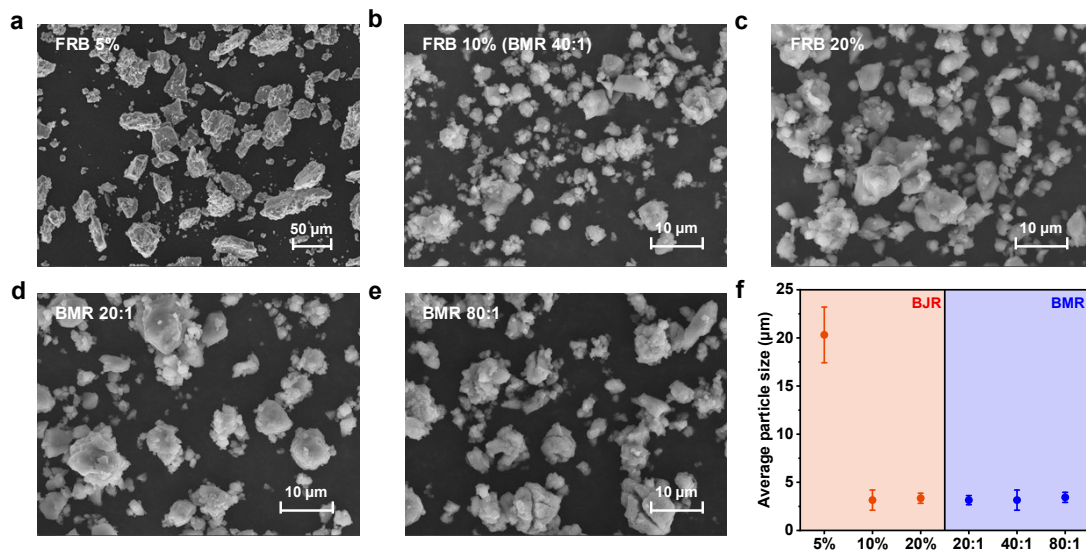

**Fig. S2.** LPSCB electrolytes prepared under different ball milling parameters (a) FRB 5%, b) FRB 10% (BMR 40:1), c) FRB 20%, d) BMR 20:1, and e) BMR 80:1. f) The corresponding particle size distribution diagram.

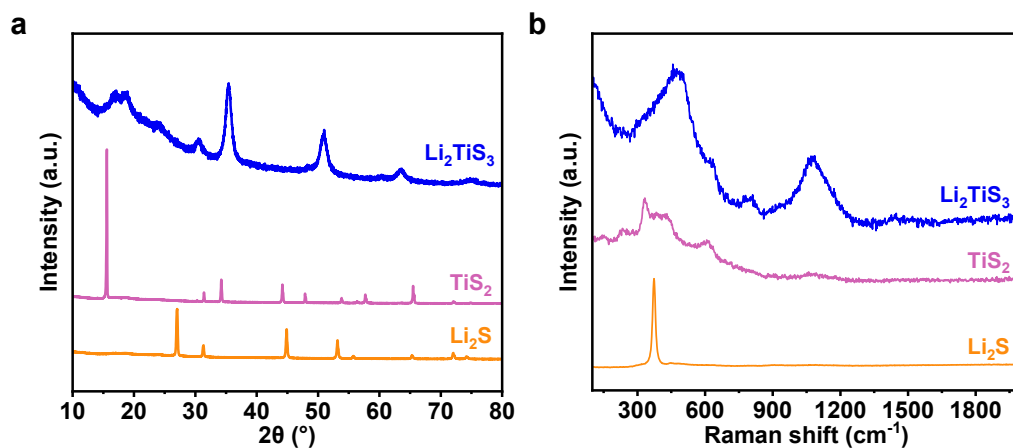

**Fig. S3.** a) XRD pattern and b) Raman spectrum of  $\text{Li}_2\text{TiS}_3$ .

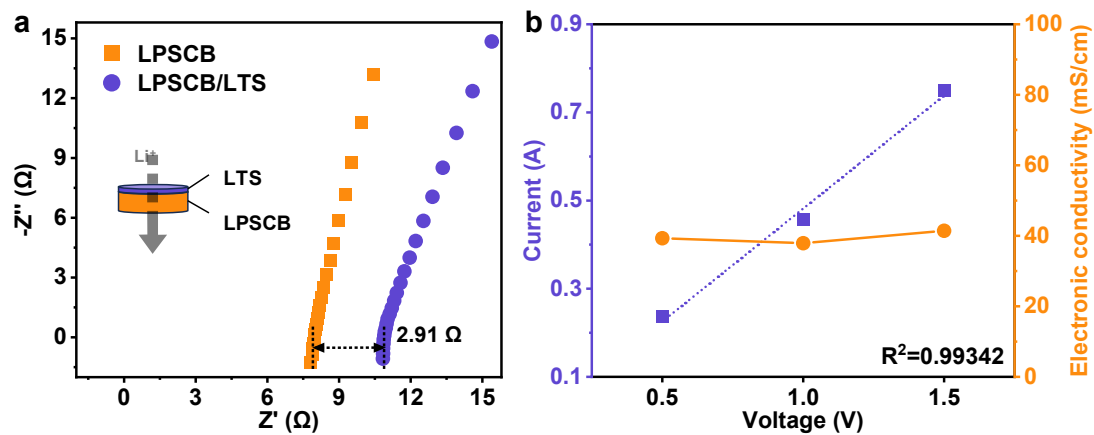

**Fig. S4.** a) Ionic conductivity and b) electronic conductivity of  $\text{Li}_2\text{TiS}_3$ .

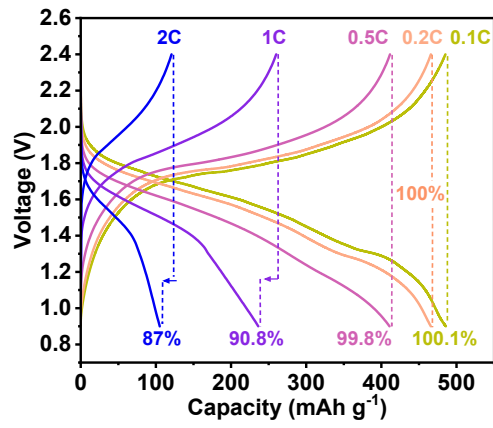

Fig. S5. Charge-discharge curves of LTS/LPSCB/Li-In battery at different rates.

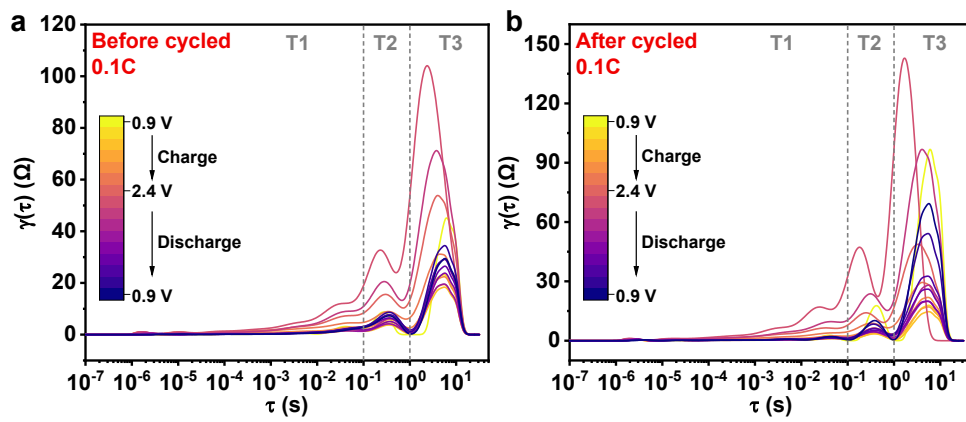

Fig. S6. DRT curves of in-situ impedance for LTS/LPSCB/Li-In batteries a) before and b) after cycling.

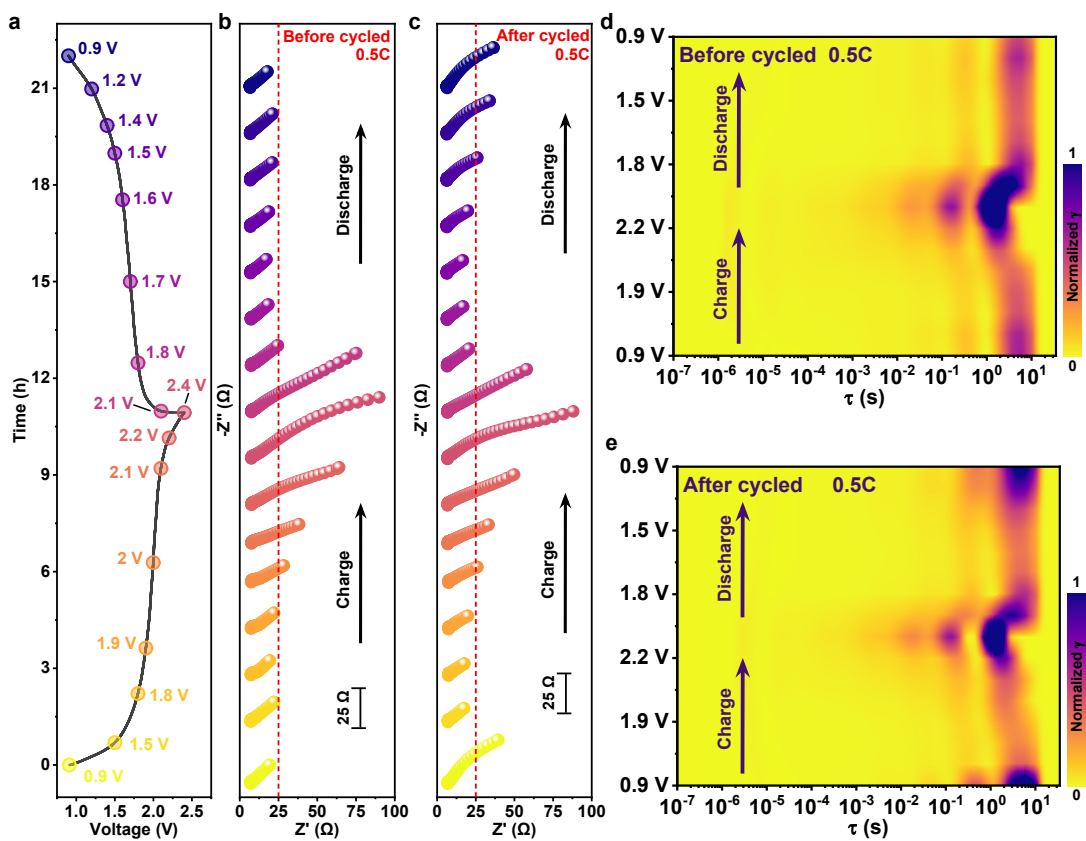

**Fig. S7.** Electrochemical evolution process of high-load LTS/LPSCB/Li-In batteries during operation. a) Voltage-time curve of ASSLBs during cycling at 0.5C. b) In-situ EIS spectra of ASSLBs b) before cycling and c) after 20 cycles. d-e) The corresponding 2D intensity mapping of DRT curves of the ASSLBs.

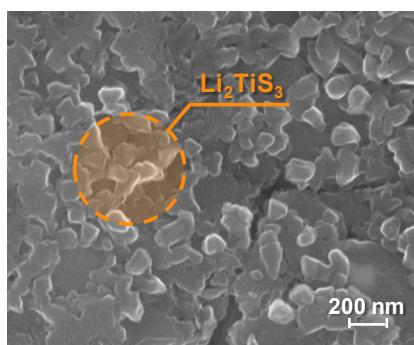

**Fig. S8.** High-resolution SEM image of the cathode region of ASSLBs after cycling.

**Table. S1.** Rietveld refinement parameters for the XRD pattern of LPSCB-5%.

| Atom site                                                                                                        | x       | y        | z       | Occ.   | Wykoff site |
|------------------------------------------------------------------------------------------------------------------|---------|----------|---------|--------|-------------|
| Li1                                                                                                              | 0.30850 | 0.00020  | 0.69150 | 0.4350 | 48h         |
| Li2                                                                                                              | 0.25000 | 0.00220  | 0.75000 | 0.0633 | 24g         |
| S1                                                                                                               | 0.00000 | 0.00000  | 1.00000 | 0.2150 | 4a          |
| S2                                                                                                               | 0.25000 | 0.25000  | 0.75000 | 0.2850 | 4d          |
| S3                                                                                                               | 0.11890 | -0.11890 | 0.61890 | 1.0000 | 16e         |
| P1                                                                                                               | 0.00000 | 0.00000  | 0.50000 | 1.0000 | 4b          |
| Cl1                                                                                                              | 0.00000 | 0.00000  | 1.00000 | 0.2450 | 4a          |
| Cl2                                                                                                              | 0.25000 | 0.25000  | 0.75000 | 0.5550 | 4d          |
| Br1                                                                                                              | 0.00000 | 0.00000  | 1.00000 | 0.5400 | 4a          |
| Br2                                                                                                              | 0.25000 | 0.25000  | 0.75000 | 0.1600 | 4d          |
| Space Group: $Pn\bar{3}m$ ; $a=b=c=9.89474\text{\AA}$ ; $\alpha=\beta=\gamma=90^\circ$ ; $V=968.755\text{\AA}^3$ |         |          |         |        |             |
| $R_p=4.11\%$ ; $R_{wp}=6.05\%$ ; $\chi^2=3.392$                                                                  |         |          |         |        |             |

**Table. S2.** Rietveld refinement parameters for the XRD pattern of LPSCB-10%(40:1).

| Atom site                                                                                                        | x       | y        | z       | Occ.   | Wykoff site |
|------------------------------------------------------------------------------------------------------------------|---------|----------|---------|--------|-------------|
| Li1                                                                                                              | 0.30855 | 0.00025  | 0.69145 | 0.4200 | 48h         |
| Li2                                                                                                              | 0.25005 | 0.00225  | 0.74995 | 0.0933 | 24g         |
| S1                                                                                                               | 0.00005 | 0.00005  | 0.99995 | 0.2110 | 4a          |
| S2                                                                                                               | 0.24995 | 0.24995  | 0.75005 | 0.2900 | 4d          |
| S3                                                                                                               | 0.11885 | -0.11890 | 0.61890 | 1.0000 | 16e         |
| P1                                                                                                               | 0.00000 | 0.00000  | 0.50000 | 1.0000 | 4b          |
| Cl1                                                                                                              | 0.00005 | 0.00000  | 1.00000 | 0.2380 | 4a          |
| Cl2                                                                                                              | 0.24995 | 0.24995  | 0.75005 | 0.5620 | 4d          |
| Br1                                                                                                              | 0.00005 | 0.00005  | 0.99995 | 0.5350 | 4a          |
| Br2                                                                                                              | 0.24995 | 0.24995  | 0.75005 | 0.1650 | 4d          |
| Space Group: $Pn\bar{3}m$ ; $a=b=c=9.90087\text{\AA}$ ; $\alpha=\beta=\gamma=90^\circ$ ; $V=970.550\text{\AA}^3$ |         |          |         |        |             |
| $R_p=4.76\%$ ; $R_{wp}=6.92\%$ ; $\chi^2=4.611$                                                                  |         |          |         |        |             |

**Table. S3.** Rietveld refinement parameters for the XRD pattern of LPSCB-20%.

| Atom site                                                                                                        | x       | y        | z       | Occ.   | Wykoff site |
|------------------------------------------------------------------------------------------------------------------|---------|----------|---------|--------|-------------|
| Li1                                                                                                              | 0.30845 | 0.00015  | 0.69155 | 0.4100 | 48h         |
| Li2                                                                                                              | 0.24995 | 0.00215  | 0.75005 | 0.1033 | 24g         |
| S1                                                                                                               | 0.00000 | 0.00000  | 1.00000 | 0.2080 | 4a          |
| S2                                                                                                               | 0.25000 | 0.25000  | 0.75000 | 0.2920 | 4d          |
| S3                                                                                                               | 0.11895 | -0.11885 | 0.61885 | 1.0000 | 16e         |
| P1                                                                                                               | 0.00000 | 0.00000  | 0.50000 | 1.0000 | 4b          |
| Cl1                                                                                                              | 0.00000 | 0.00000  | 1.00000 | 0.2420 | 4a          |
| Cl2                                                                                                              | 0.25000 | 0.25000  | 0.75000 | 0.5580 | 4d          |
| Br1                                                                                                              | 0.00000 | 0.00000  | 1.00000 | 0.5320 | 4a          |
| Br2                                                                                                              | 0.25000 | 0.25000  | 0.75000 | 0.1680 | 4d          |
| Space Group: $Pn\bar{3}m$ ; $a=b=c=9.89790\text{\AA}$ ; $\alpha=\beta=\gamma=90^\circ$ ; $V=969.680\text{\AA}^3$ |         |          |         |        |             |
| $R_p=4.55\%$ ; $R_{wp}=6.55\%$ ; $\chi^2=3.991$                                                                  |         |          |         |        |             |

**Table. S4.** Rietveld refinement parameters for the XRD pattern of LPSCB-20:1.

| Atom site                                                                                                        | x       | y        | z       | Occ.   | Wykoff site |
|------------------------------------------------------------------------------------------------------------------|---------|----------|---------|--------|-------------|
| Li1                                                                                                              | 0.30860 | 0.00030  | 0.69140 | 0.4400 | 48h         |
| Li2                                                                                                              | 0.25010 | 0.00230  | 0.74990 | 0.0533 | 24g         |
| S1                                                                                                               | 0.00010 | 0.00010  | 0.99990 | 0.2180 | 4a          |
| S2                                                                                                               | 0.24990 | 0.24990  | 0.75010 | 0.2820 | 4d          |
| S3                                                                                                               | 0.11880 | -0.11900 | 0.61900 | 1.0000 | 16e         |
| P1                                                                                                               | 0.00000 | 0.00000  | 0.50000 | 1.0000 | 4b          |
| Cl1                                                                                                              | 0.00010 | 0.00010  | 0.99990 | 0.2480 | 4a          |
| Cl2                                                                                                              | 0.24990 | 0.24990  | 0.75010 | 0.5520 | 4d          |
| Br1                                                                                                              | 0.00010 | 0.00010  | 0.99990 | 0.5450 | 4a          |
| Br2                                                                                                              | 0.24990 | 0.24990  | 0.75010 | 0.1550 | 4d          |
| Space Group: $Pn\bar{3}m$ ; $a=b=c=9.90887\text{\AA}$ ; $\alpha=\beta=\gamma=90^\circ$ ; $V=972.892\text{\AA}^3$ |         |          |         |        |             |
| $R_p=4.65\%$ ; $R_{wp}=6.73\%$ ; $\chi^2=4.113$                                                                  |         |          |         |        |             |

**Table. S5.** Rietveld refinement parameters for the XRD pattern of LPSCB-80:1.

| Atom site                                                                               | x       | y        | z       | Occ.   | Wykoff site |
|-----------------------------------------------------------------------------------------|---------|----------|---------|--------|-------------|
| Li1                                                                                     | 0.30840 | 0.00010  | 0.69160 | 0.3800 | 48h         |
| Li2                                                                                     | 0.24990 | 0.00210  | 0.75010 | 0.1567 | 24g         |
| S1                                                                                      | 0.00000 | 0.00000  | 1.00000 | 0.2050 | 4a          |
| S2                                                                                      | 0.25000 | 0.25000  | 0.75000 | 0.2950 | 4d          |
| S3                                                                                      | 0.11900 | -0.11880 | 0.61880 | 1.0000 | 16e         |
| P1                                                                                      | 0.00000 | 0.00000  | 0.50000 | 1.0000 | 4b          |
| Cl1                                                                                     | 0.00000 | 0.00000  | 1.00000 | 0.2350 | 4a          |
| Cl2                                                                                     | 0.25000 | 0.25000  | 0.75000 | 0.5650 | 4d          |
| Br1                                                                                     | 0.00000 | 0.00000  | 1.00000 | 0.5280 | 4a          |
| Br2                                                                                     | 0.25000 | 0.25000  | 0.75000 | 0.1720 | 4d          |
| Space Group: ; a=b=c=9.89566Å; $\alpha=\beta=\gamma=90^\circ$ ; $V=969.025\text{\AA}^3$ |         |          |         |        |             |
| $R_p=3.36\%$ ; $R_{wp}=4.95\%$ ; $\chi^2=2.360$                                         |         |          |         |        |             |
